# Supplementary material for: Direct functionalization of multi-walled carbon nanotubes (MWCNTs) via grafting of poly(furfuryl methacrylate) using Diels–Alder “click chemistry” and its thermoreversibility
Source: Royal Society of Chemistry journal article supplement (doi:10.1039/c5ra16758b), 2015-01-01
Supplement: c5ra16758b1.pdf [file c5ra16758b1.pdf]

# Direct Functionalization of Multi-Walled Carbon Nanotube (MWCNT) via grafting of poly(furfuryl methacrylate) using Diels-Alder “Click Chemistry” and its thermoreversibility

Nabendu B Pramanik, Nikhil K Singha\*

Indian Institute of Technology Kharagpur, Rubber Technology Centre, Kharagpur- 721302, West Bengal, India

\*Corresponding Author: Dr. Nikhil K. Singha, E-mail: nks@rtc.iitkgp.ernet.in,

Tel.: +91 3222 283178, Fax: +91 3222 255303.

## Supporting Information

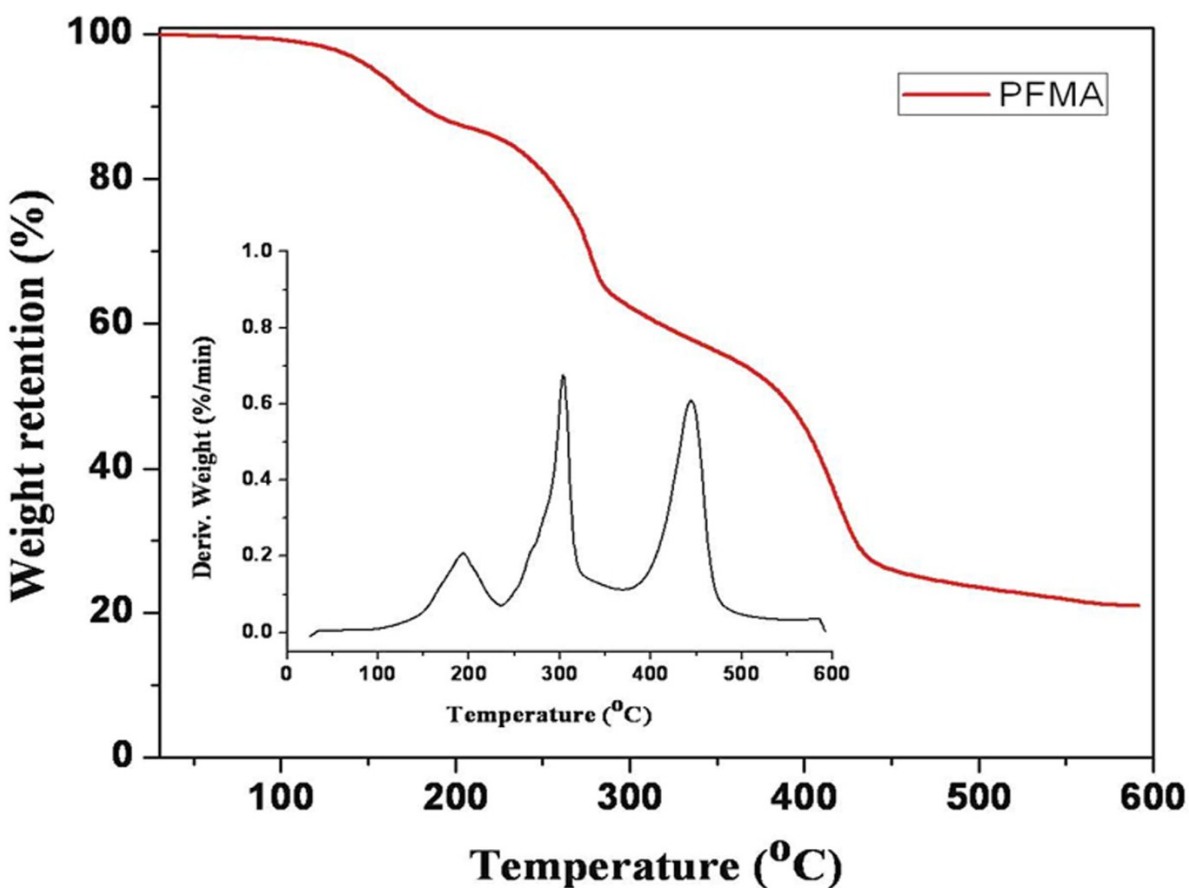

Figure S1. TGA and DTG thermogram of PFMA prepared via RAFT polymerization.
